# Supplementary material
Source: PubMed Central journal article supplement (PMC5367646)
Supplement: Supplementary_material.pdf [file Supplementary_material.pdf]

**Title:**

Tetrabenazine in treatment of hyperkinetic movement disorders

- An observational study

**Authors:**

Rita Miguel<sup>1</sup>, Marcelo D Mendonça<sup>1,2</sup>, Raquel Barbosa<sup>1</sup>, Filipa Ladeira<sup>1</sup>, Tânia Lampreia<sup>1</sup>, José Vale<sup>3</sup>, Paulo Bugalho<sup>1,2</sup>

**Affiliations:**

1. Neurology Department, Hospital Egas Moniz – Centro Hospitalar de Lisboa Ocidental, Lisbon, Portugal
2. CEDOC, Nova Medical School/Faculdade de Ciências Médicas, Universidade Nova de Lisboa, Lisbon, Portugal
3. Department of Neurology, Hospital Beatriz Ângelo, Loures, Portugal.

## Supplementary Material

**Figure S1.** Maximum reached daily dose and respective titration time for each diagnostic category.

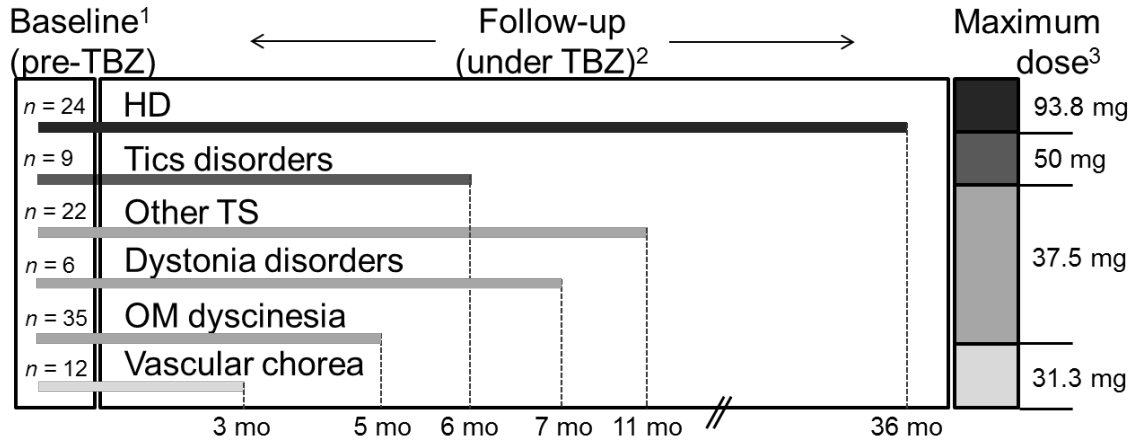

### Legend:

Abbreviations: HD, Huntington disease. TS, tardive syndrome. OM, oromandibular dyskinesia. mo, months.

Values are expressed in mg and months.

1. Visit pre-TBZ onset and  $n$  patients included in each diagnostic category (total  $n = 108$ ).
2. Time spent (mo) to reach maximum TBZ dose (median).
3. Maximum daily TBZ dose (median).

**Figure S2.** Threshold exposure time and dose for eliciting AEs for each diagnostic category.

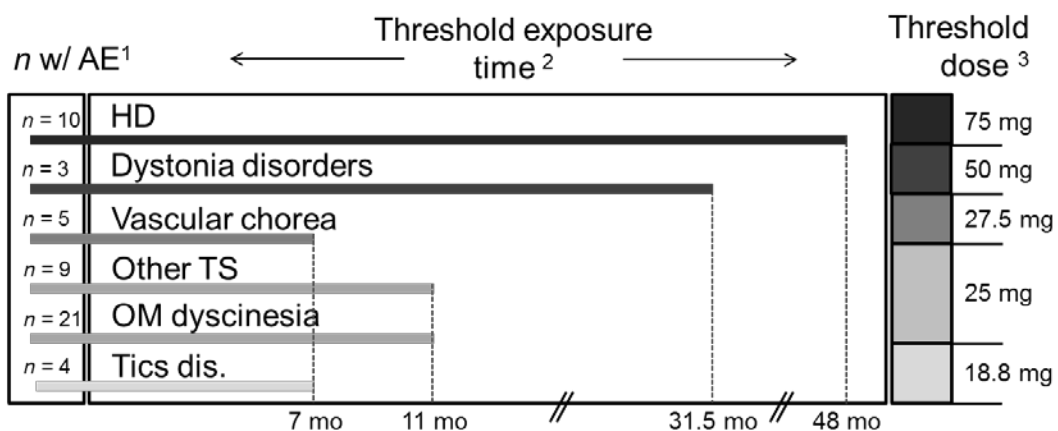

**Legend:**

Abbreviations: AE, adverse events. HD, Huntington disease. TS, tardive syndrome. mo, months. w/, with.

Values are expressed in mg and months.

1. *n* patients who developed AE (total *n* = 52).
2. Minimal threshold TBZ exposure time for eliciting AE.
3. Minimal threshold dose for eliciting AE.

**Figure S3.** Threshold exposure time and dose for eliciting each type of AE.

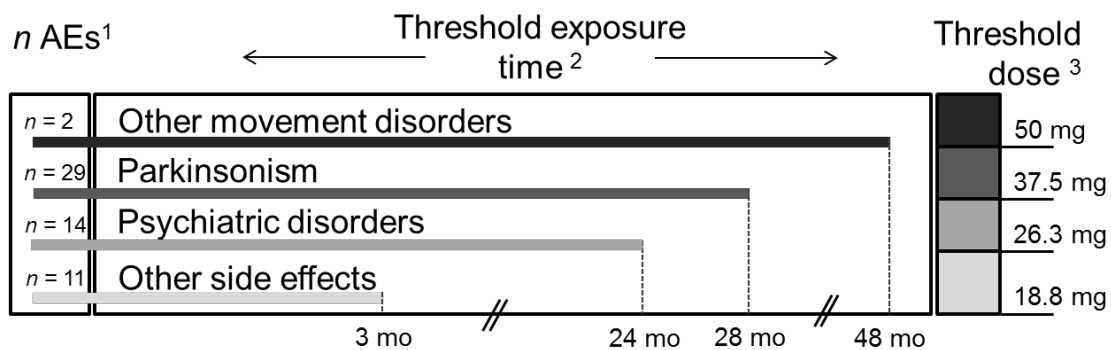

**Legend:**

Abbreviations: AE, adverse events. TBZ, tetrabenazine. mo, months.

Values are expressed in mg and months.

1. *n* of AEs occurrences (total *n* = 56 events).
2. Minimal TBZ exposure time for eliciting AEs.
3. Minimal threshold dose for eliciting AEs.
